# Supplementary material
Source: PubMed Central journal article supplement (PMC3684415)

# FIGURE S1

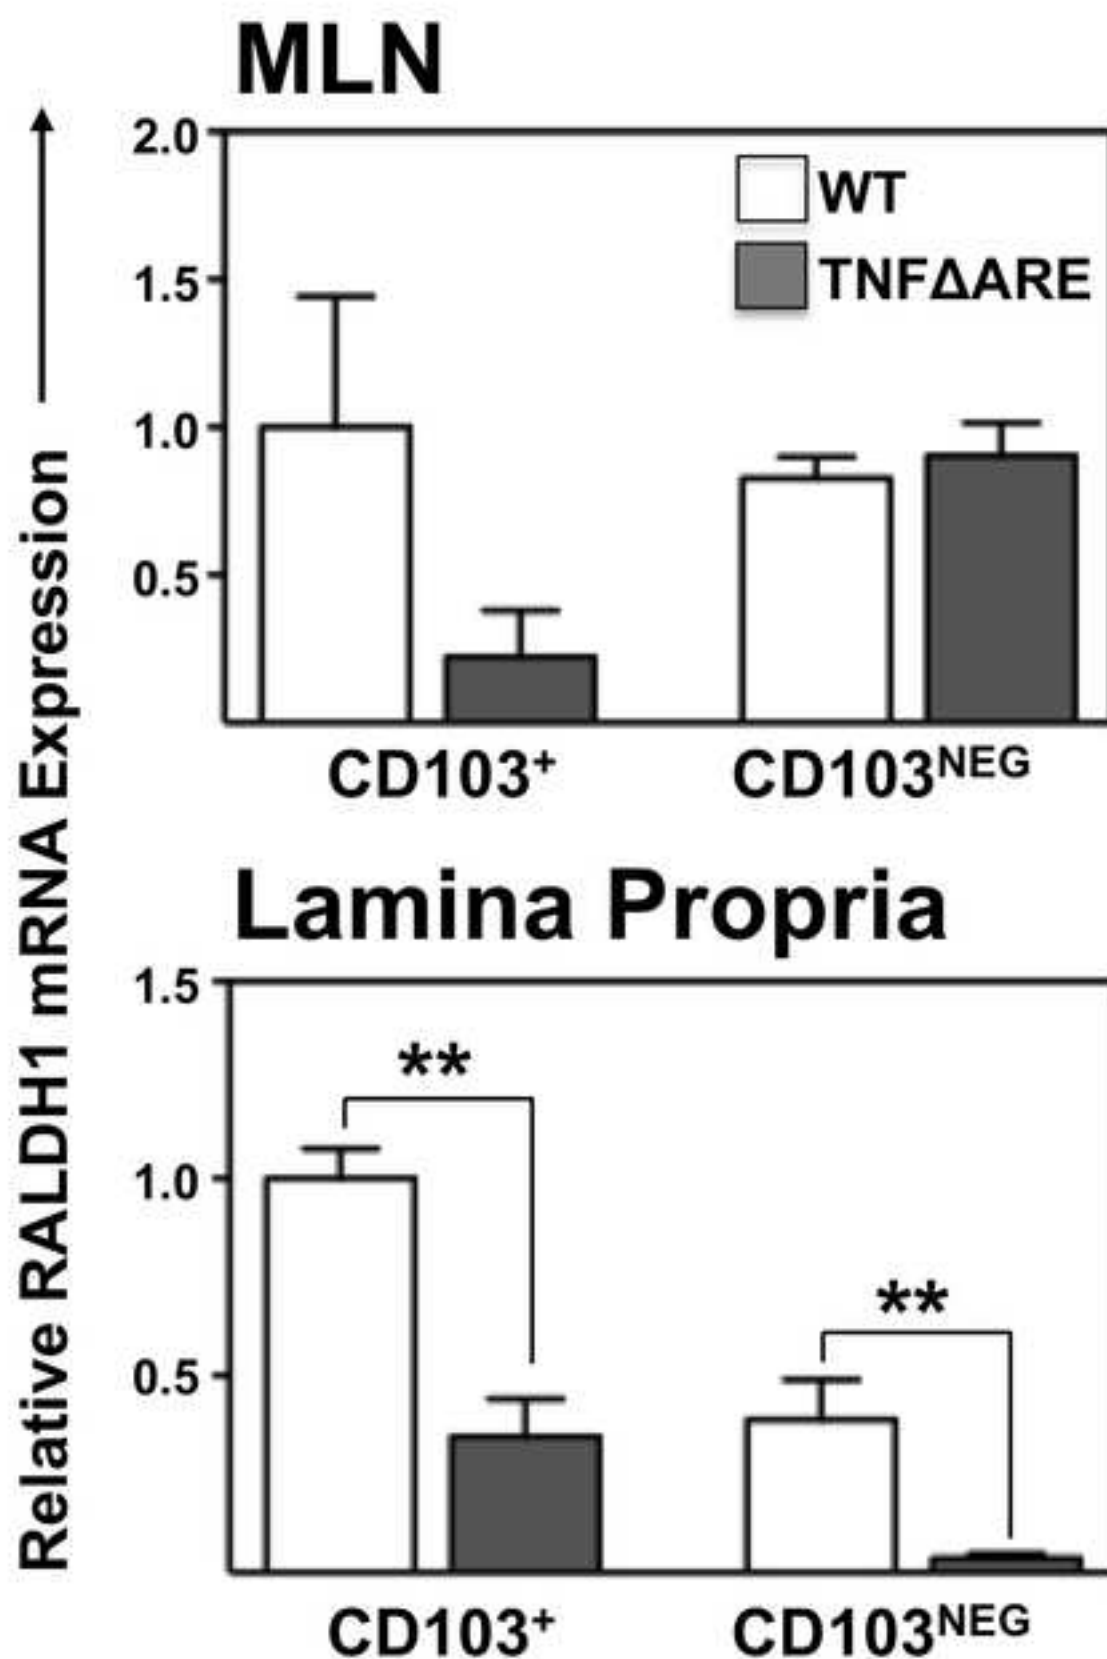

## FIGURE S2

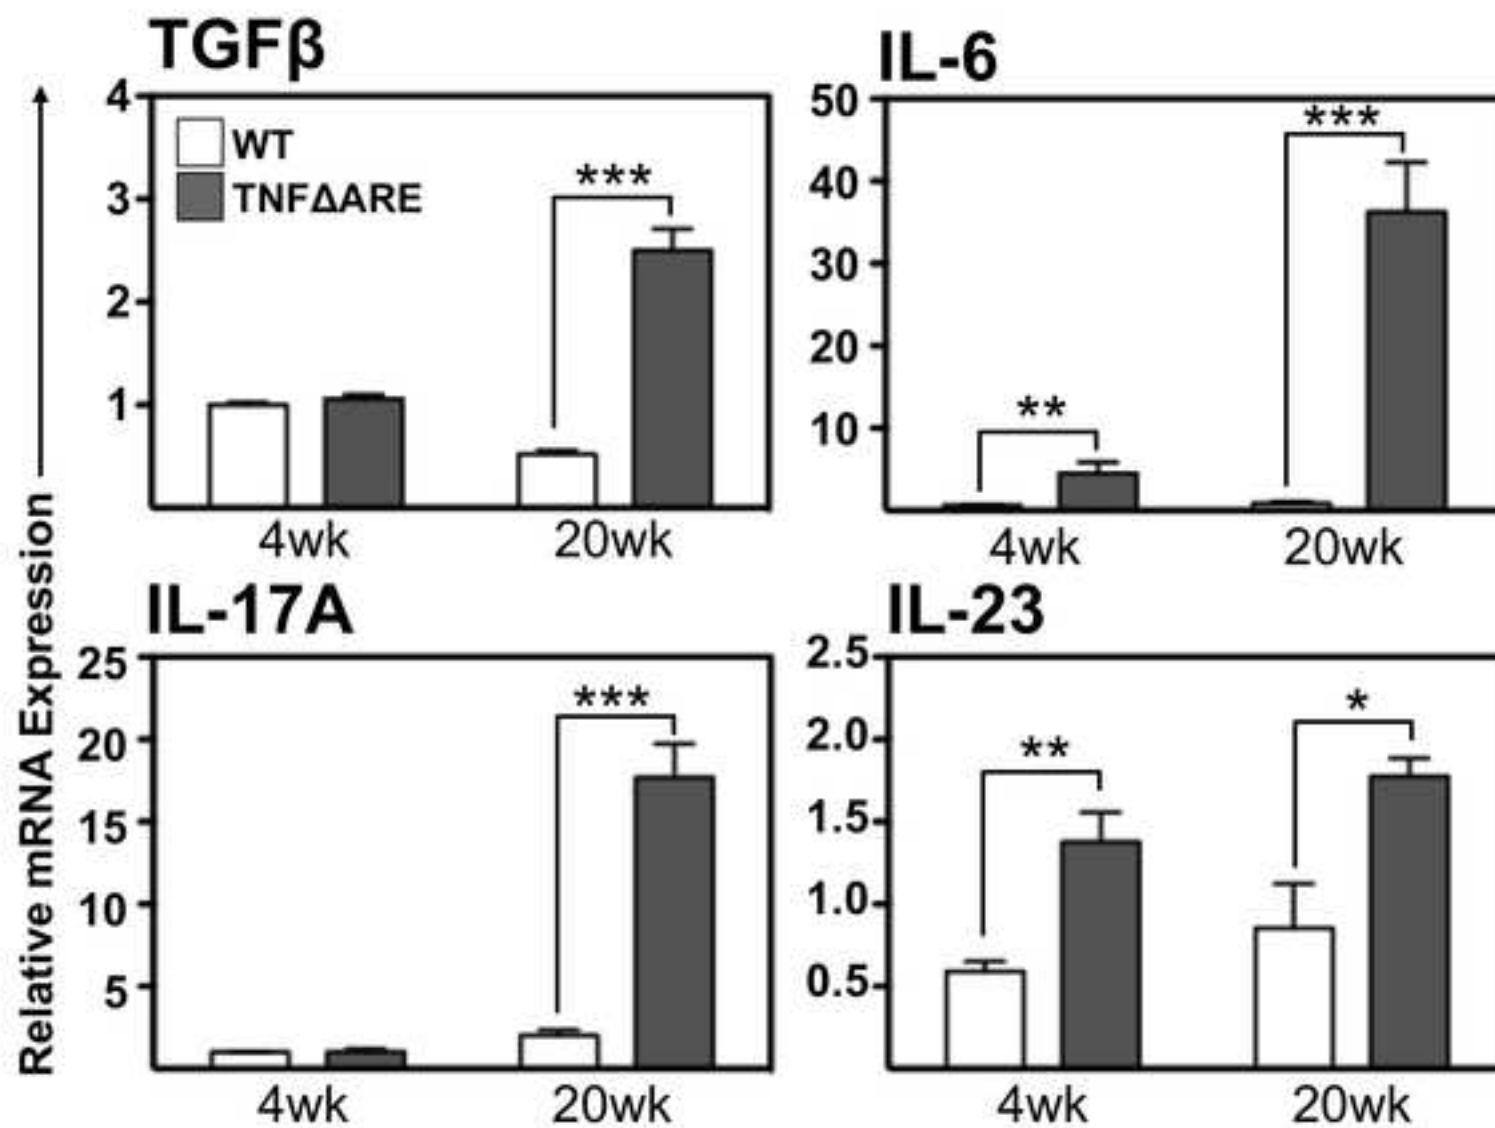

## FIGURE S3

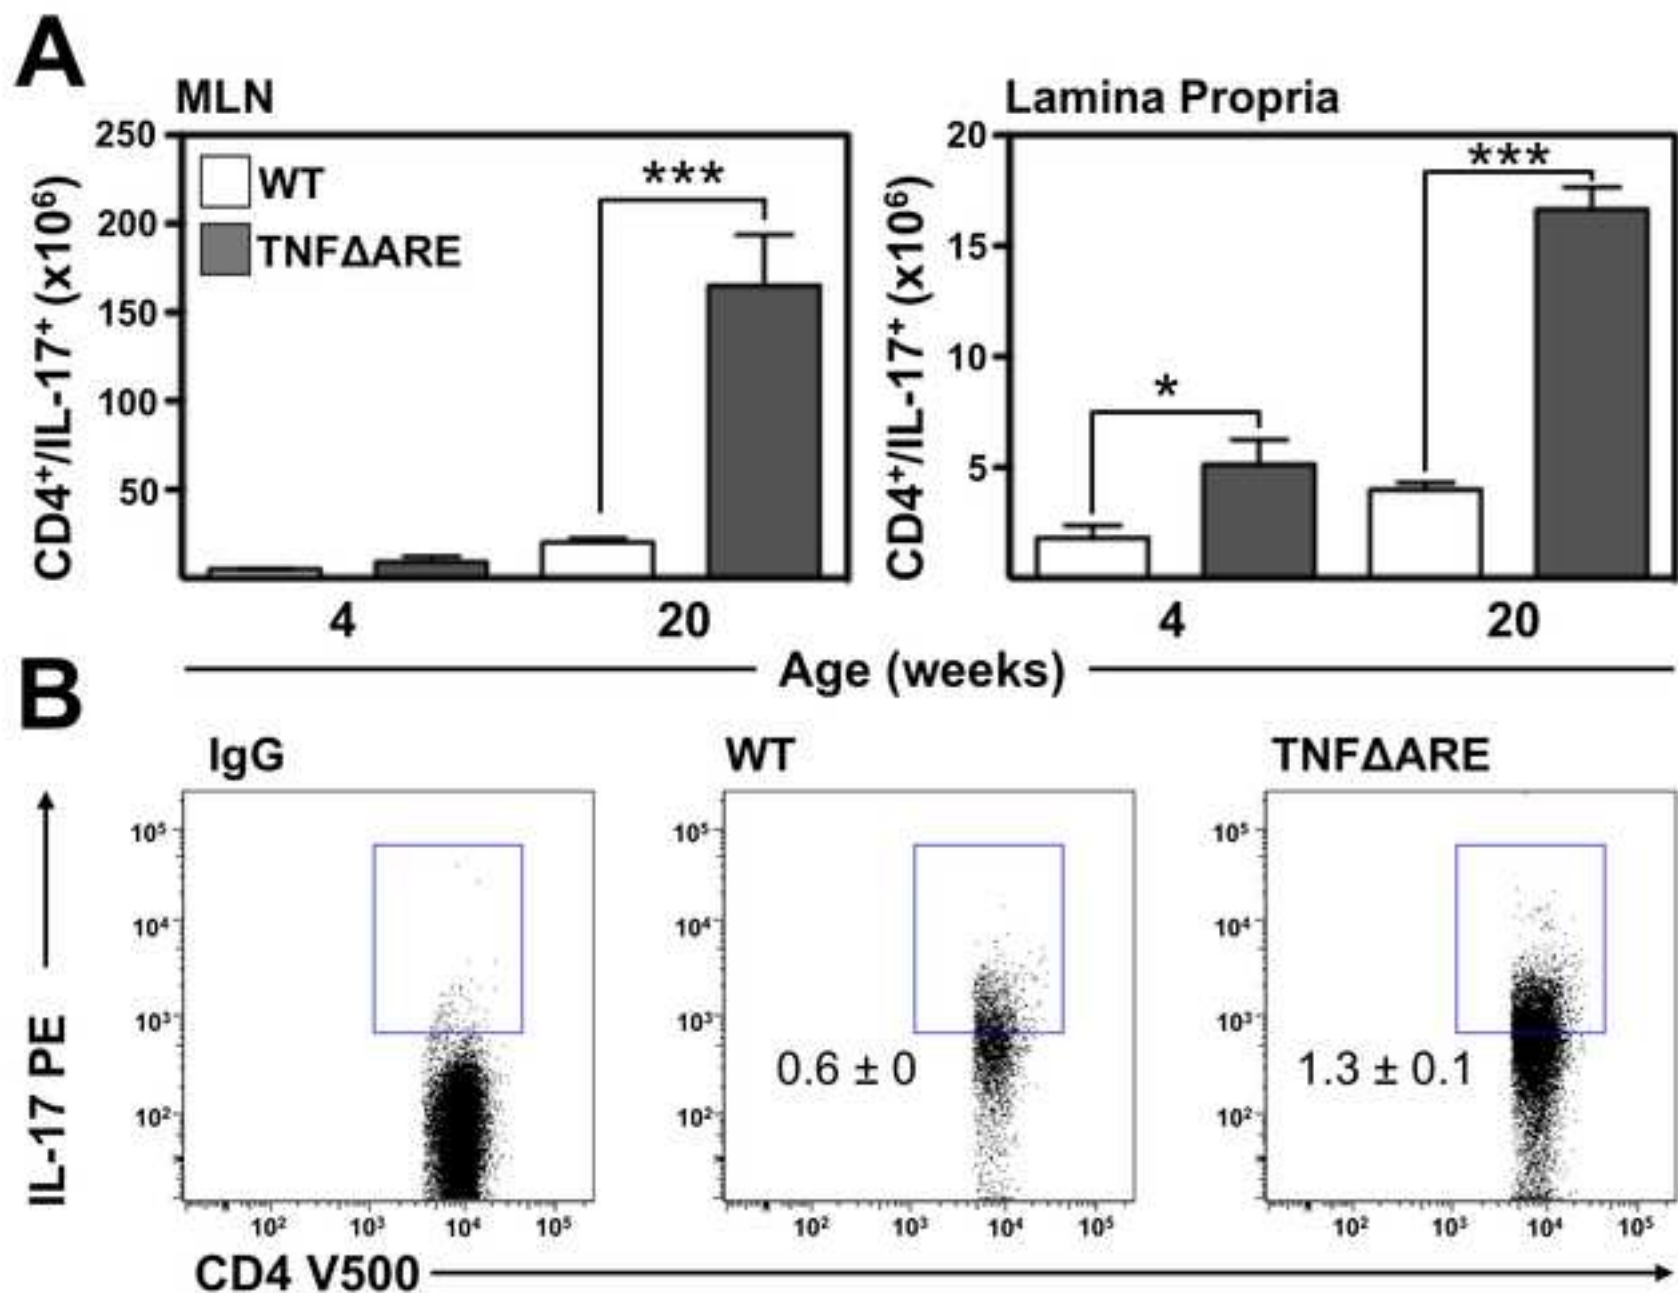

# FIGURE S4

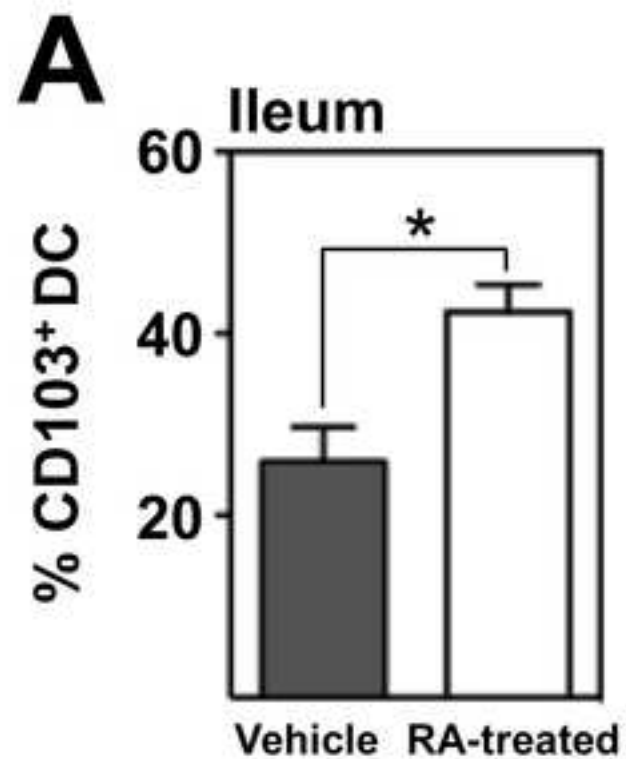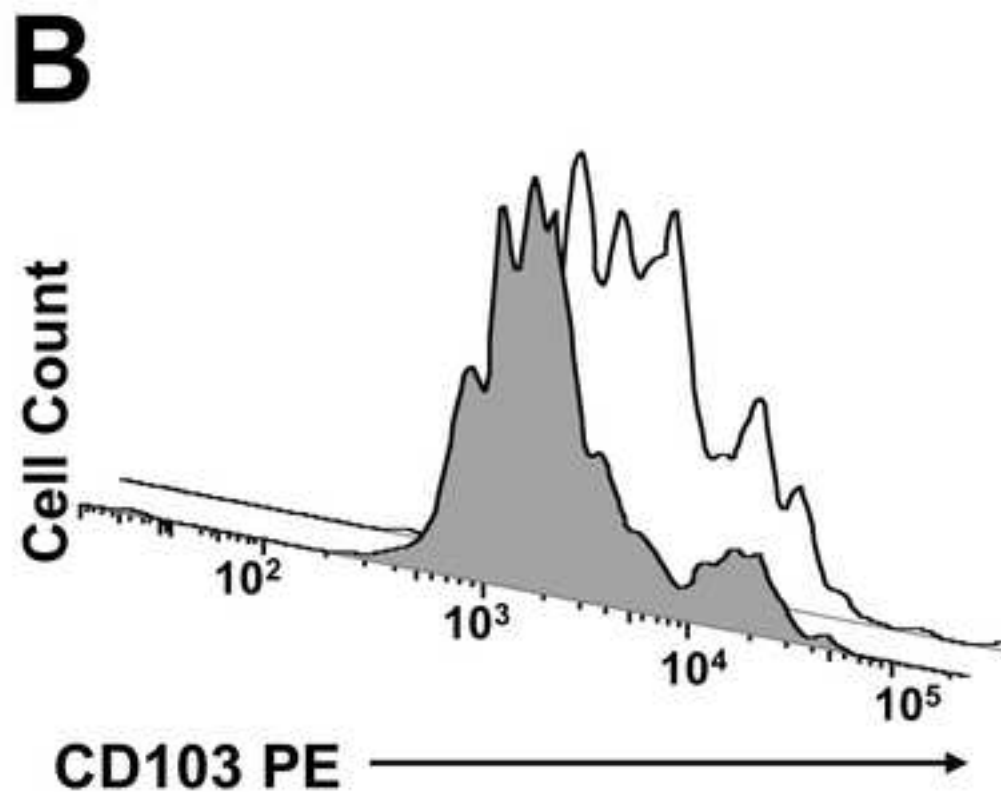

## FIGURE S5

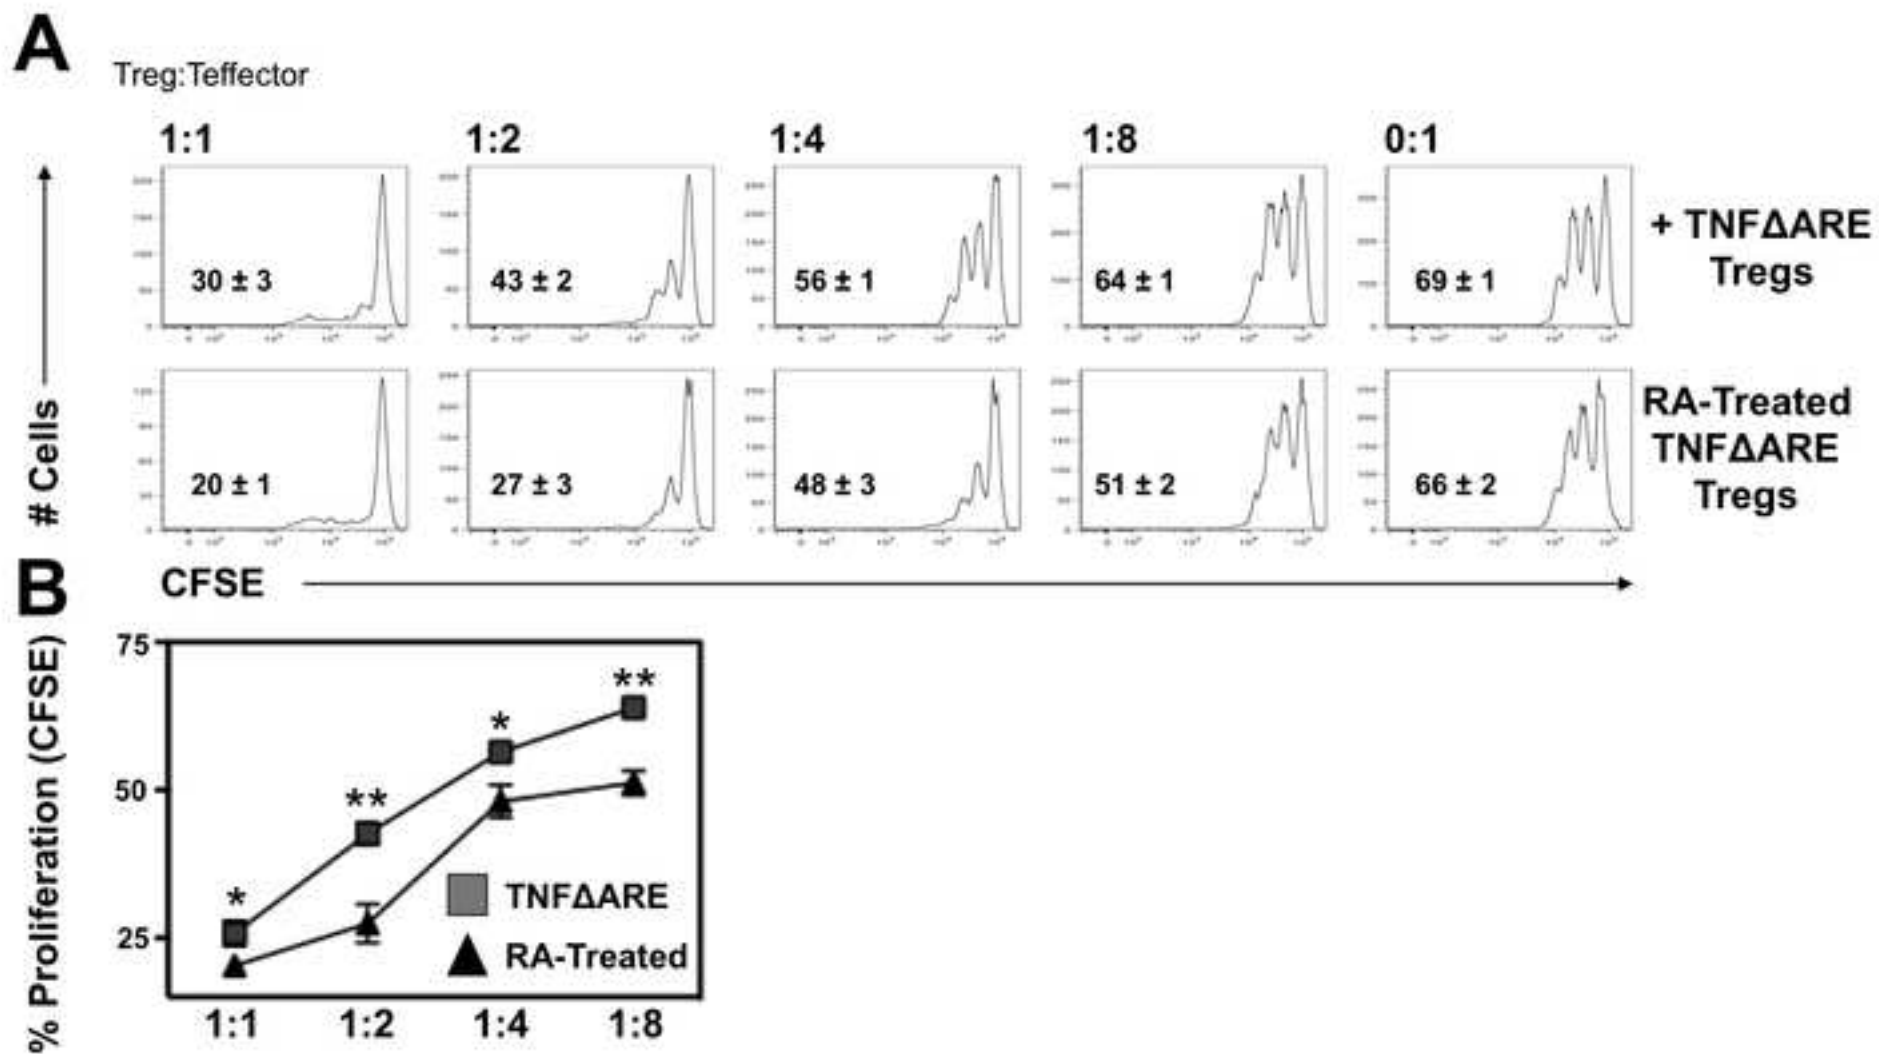

FIGURE S6

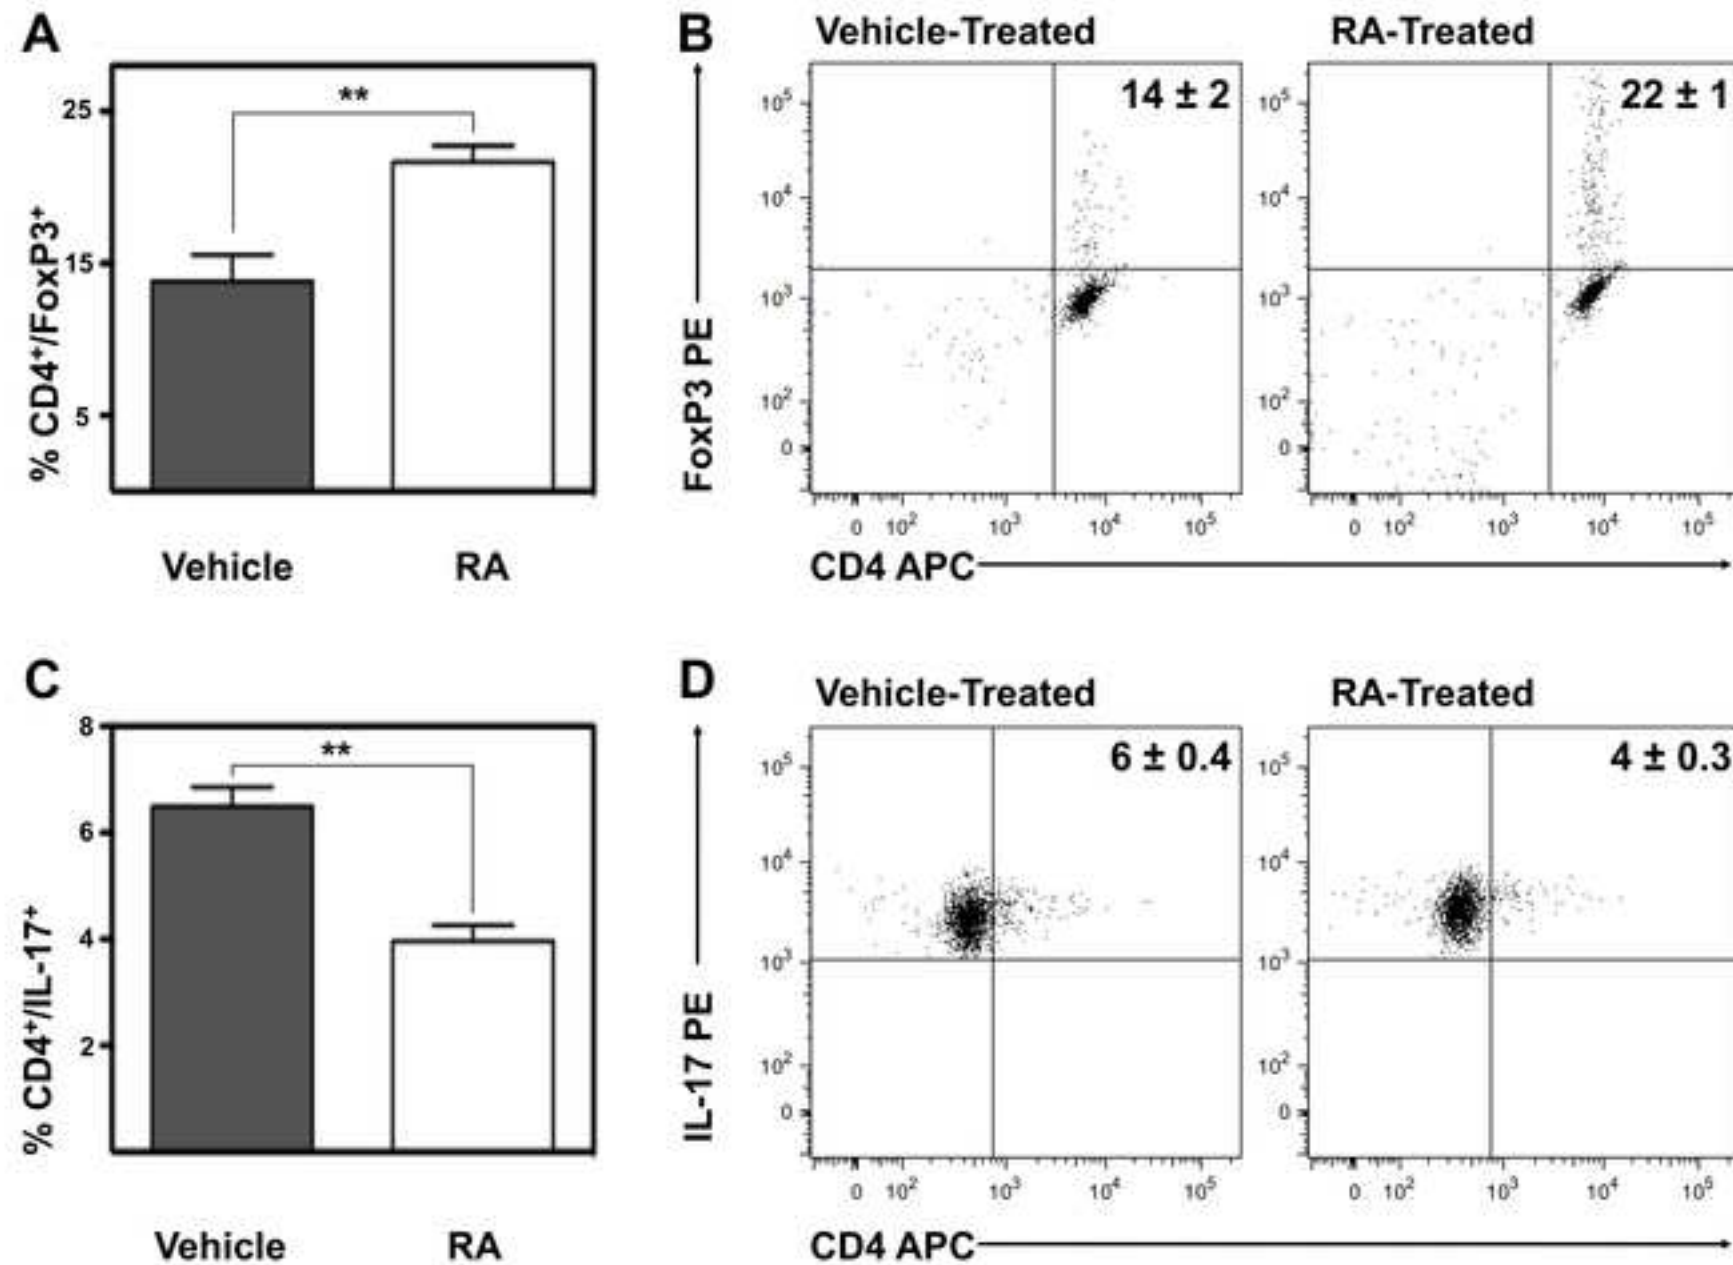

**FIGURE S7** TNF-driven ileitis

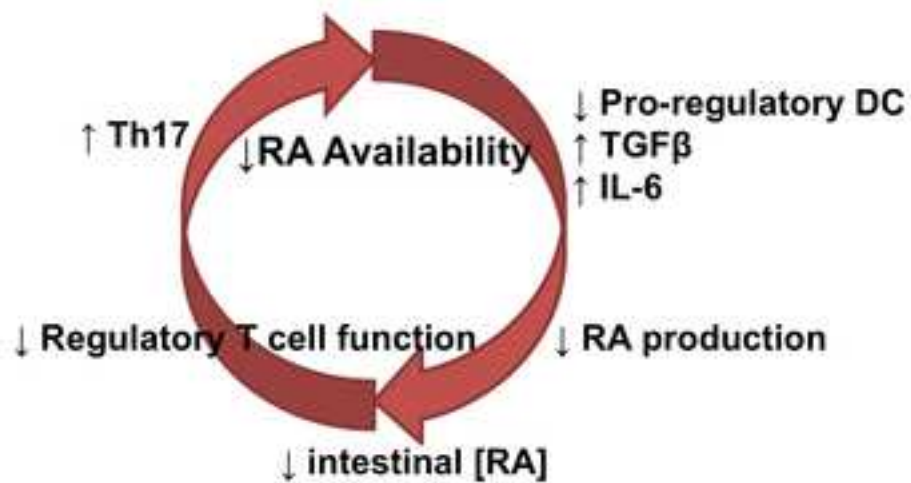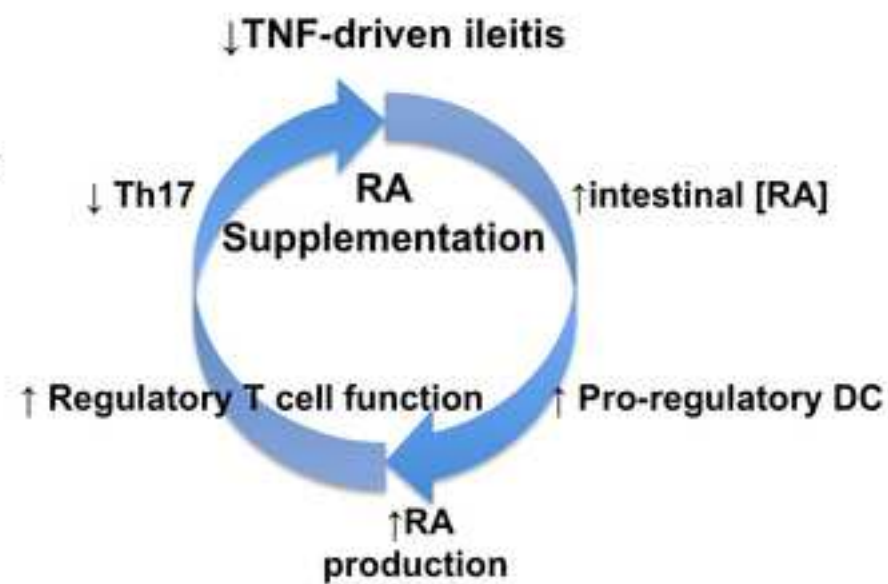

Supplement: NIHMS305085-supplement-01.pdf [file NIHMS305085-supplement-01.pdf]
